# Supplementary material for: A robust molecular unit nanogrid servicing as network nodes via molecular installing technology
Source: Royal Society of Chemistry journal article supplement (doi:10.1039/c6qm00004e), 2016-08-09

## Supporting Information

### A Robust Molecular Unit Nanogrid Servicing as Network Nodes via Molecular Installing Technology

Guangwei Zhang,<sup>a,†</sup> Ying Wei,<sup>a,†</sup> Jishu Wang,<sup>a,†</sup> Yuyu Liu,<sup>a</sup> Linghai Xie,<sup>a,\*</sup> Long Wang,<sup>a</sup>  
Baoyi Ren,<sup>c</sup> Wei Huang<sup>a,b,\*</sup>

<sup>a</sup>Centre for Molecular Systems and Organic Devices (CMSOD), Key Laboratory for Organic Electronics and Information Displays & Institute of Advanced Materials (IAM), Jiangsu National Synergetic Innovation Center for Advanced Materials (SICAM), Nanjing University of Posts & Telecommunications, 9 Wenyuan Road, Nanjing 210023, China.

<sup>b</sup>Key Laboratory of Flexible Electronics (KLOFE) & Institute of Advanced Materials (IAM), Jiangsu National Synergetic Innovation Center for Advanced Materials (SICAM), Nanjing Tech University (NanjingTech), 30 South Puzhu Road, Nanjing 211816, China.

<sup>c</sup>College of Applied Chemistry, Shenyang University of Chemical Technology, No. 11 Street, Shenyang Economic and Technological Development Area, Shenyang 110142, China.

wei-huang@njtech.edu.cn; iamlhxie@njupt.edu.cn

### Table of contents

|                      |                                                                        |
|----------------------|------------------------------------------------------------------------|
| <b>SI-2 – SI-3</b>   | General procedures                                                     |
| <b>SI-3 – SI-11</b>  | Experimental procedures and characterization                           |
| <b>SI-12</b>         | OLED based on <b>Grid</b>                                              |
| <b>SI-12</b>         | References                                                             |
| <b>SI-14 – SI-16</b> | MALDI-TOF-MS of compounds                                              |
| <b>SI-17</b>         | GPC spectrum and crude product of <b>Grid</b>                          |
| <b>SI-17</b>         | Standard potential for ferrocene/ferrocenium vs Ag/Ag <sup>+</sup>     |
| <b>SI-18</b>         | The HOMO and LUMO energy levels of <b>Grid</b>                         |
| <b>SI-19 – SI-26</b> | Copies of <sup>1</sup> H and <sup>13</sup> C NMR spectra for compounds |

## General Procedures

**Chemicals:** All the solvents and reagents were purchased from commercial suppliers and used without further purification, unless noted otherwise. All products were purchased by flash column chromatography which was carried out with Kanto Silica Gel 60N (40-63  $\mu\text{m}$ ). Spectrochemical-grade solvents were used for optical measurements. Palladiumacetate ( $\text{Pd}(\text{OAc})_2$ ), tetra(triphenylphosphine)palladium ( $\text{Pd}(\text{PPh}_3)_4$ ), 1,1'-bis(diphenylphosphino)ferrocene (dppf), 2-Bromo-9-fluorenone, bromobenzene and 9-hexylcarbazole were obtained from Aldrich Chemical Co. Borontrifluoride etherate, potassium carbonate, magnesium sulphate, chloroform, and toluene were purchased from Sinopharm Chemical Reagent Co, Ltd. without further purification. Dichloromethane were dried by anhydrous sodium under room temperature. THF and toluene were dried over sodium benzophenone ketyl anion radical and distilled under a dry nitrogen atmosphere immediately prior to use. 2-bromo-9-phenylfluoren-9-ol (**1**), 2-(4,4,5,5-tetramethyl-1,3,2-dioxaborolan-2-yl)-9-phenylfluoren-9-ol (**2**) were obtained according to the reported literatures<sup>1</sup>.

**Characterization:**  $^1\text{H}$ -NMR and  $^{13}\text{C}$ -NMR were recorded on a Bruker 400 MHz spectrometer in  $d\text{-CDCl}_3$  with tetramethylsilane (TMS) as the interval standard. Mass spectra were recorded on a Shimadzu GC-MS 2010 PLUS. For the MALDI-TOF MS spectra, the spectra were recorded in reflective mode, and substrates were used. Molecular weights of the samples were measured by Gel permeation chromatography (GPC) on a Shimadzu LC-20A HPLC system equipped with 7911GP-502 and GPNXC columns. The calibration curves for GPC analysis were obtained using polystyrene standards with a low polydispersity. The sample (10 mg) was dissolved in THF (2 mL) and the solution was filtered through a membrane filter with a 0.45  $\mu\text{m}$  pore size. Absorption spectra were measured with a Shimadzu UV-3150 spectrometer at 25  $^\circ\text{C}$ , and emission spectra were recorded on a Shimadzu RF-530XPC luminescence spectrometer upon excitation at the absorption maxima. Cyclic Voltammetry (CV) were conducted at room temperature on the

CHI660E system in a typical three-electrode cell with a platinum sheet working electrode, a platinum wire counter electrode, and a silver/silver nitrate ( $\text{Ag}/\text{Ag}^+$ ) reference electrode. All electrochemical experiments were carried out under a nitrogen atmosphere at room temperature and performed on the solution of the sample on a glassy carbon electrode measured in  $\text{Bu}_4\text{PF}_6$  (0.1 M)/acetonitrile at a sweeping rate of 0.1V/s. According to the redox onset potentials of the CV measurements, the highest occupied molecular orbital (HOMO)/lowest unoccupied energy levels (LUMO) of the materials are estimated based on the reference energy level of ferrocene (4.8 eV below the vacuum):  $\text{HOMO/LUMO} = -(E_{\text{ox/red}} - 0.09 \text{ V}) + 4.8 \text{ eV}$ , where the value 0.09 V is the standard potential for ferrocene/ferrocenium vs  $\text{Ag}/\text{Ag}^+$ . Thermogravimetric analyses (TGA) were conducted on a Shimadzu DTG-60H thermogravimetric analyzer under a heating rate of 10 °C /min. Differential scanning calorimetry (DSC) analyses were performed on a Shimadzu DSC-60A Instrument at a heating rate of 10 °C/min.

**Theoretical Method:** All the quantum-chemical calculations were performed using the Gaussian 09 program suite.<sup>2</sup> Non-covalent interactions (NCI) index is used to reveal weak bonding interactions and their intensities.<sup>3</sup> The visualizing weak interactions in real space have been performed using Multiwfn 2.6 software and VMD by analyzing and plotting electrostatic potential on molecular surface.<sup>4</sup>

## Experimental procedures and characterization

### Synthesis of 2-(4,4,5,5-tetramethyl-1,3,2-dioxaborolan-2-yl)-9-phenylfluoren-9-ol (**2**)<sup>1</sup>:

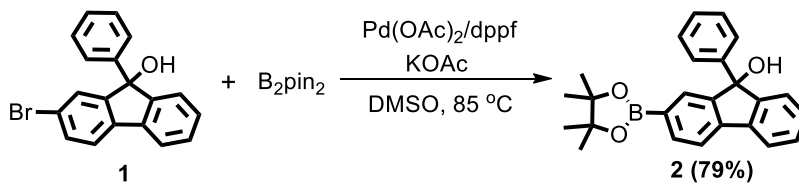

In a three-necked schlenk flask (150 mL), **1**<sup>1</sup> (3.360 g, 10 mmol.),  $\text{B}_2\text{Pin}_2$  (3.05 g, 12 mmol.),  $\text{Pd}(\text{OAc})_2$  (67 mg, 0.3 mmol.), KOAc (2.94 g, 30 mmol.), dppf (0.332 g, 0.6 mmol.) were added. The flask was evacuated and back-filled with nitrogen atmosphere over three times,

after which DMSO (30 mL) were injected into the flask through syringe. The reaction mixture was heated up to 80 °C and stirred for 8 h. The mixture was extracted three times with CH<sub>2</sub>Cl<sub>2</sub> and the organic layer was dried over MgSO<sub>4</sub>, filtered and the solvent was removed under reduced pressure. Purification by silica gel column chromatography (petroleum ether : CH<sub>2</sub>Cl<sub>2</sub> = 20:1) to give **2** (3.03 g, 79%) as a pale yellow powder. <sup>1</sup>H NMR (400 MHz, CDCl<sub>3</sub>) δ 7.84 (dd, *J* = 7.5, 0.8 Hz, 1H), 7.77 (s, 1H), 7.69 (t, *J* = 7.1 Hz, 2H), 7.41 – 7.36 (m, 3H), 7.36 (d, *J* = 1.3 Hz, 1H), 7.33 (s, 1H), 7.31 (s, 1H), 7.29 (q, *J* = 2.3 Hz, 1H), 7.24 (dt, *J* = 5.8, 2.0 Hz, 2H), 7.21 (d, *J* = 3.6 Hz, 1H), 2.47 (s, 1H), 1.31 (s, 13H). <sup>13</sup>C NMR (100 MHz, CDCl<sub>3</sub>) δ 149.73, 142.61, 139.33, 136.02, 129.07, 128.98, 128.22, 127.13, 125.52, 124.85, 120.52, 119.47, 83.86, 83.63, 25.03, 24.99, 24.75. GC-MS (*m/z*): calcd. For C<sub>25</sub>H<sub>25</sub>BO<sub>3</sub>: 384.1 [M<sup>+</sup>]; Found: 384.0.

#### Synthesis of 9,9'-diphenyl-[2,2'-bifluorene]-9,9'-diol (**I-1**):

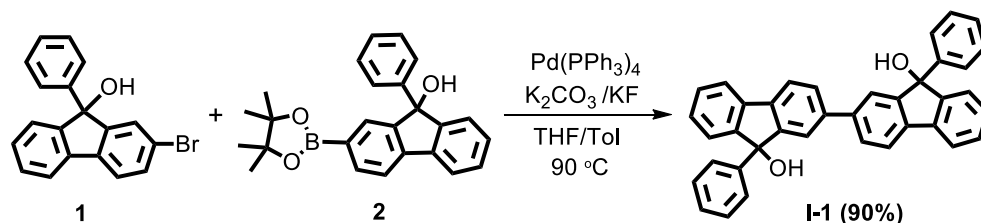

In a three-necked schlenk flask (150 mL), **1** (0.336 g, 1 mmol.), **2** (0.461 g, 1.2 mmol.), Pd(PPh<sub>3</sub>)<sub>4</sub> (35 mg, 0.03mmol.) were added. The flask was evacuated and back-filled with nitrogen atmosphere over three times, after which degassed toluene (30 mL) and K<sub>2</sub>CO<sub>3</sub> aqueous solution (2 M, 5 mL, 10 eq) were injected into the flask through syringe. The mixture was heated up to 90 °C and stirred for 24 h. The mixture was extracted three times with CH<sub>2</sub>Cl<sub>2</sub> and the organic layer was dried over MgSO<sub>4</sub>, filtered and the solvent was removed under reduced pressure. Purification by silica gel column chromatography (petroleum ether : CH<sub>2</sub>Cl<sub>2</sub> = 1:1) to afford **I-1** (0.463 g, 90%) as a pale yellow powder. <sup>1</sup>H NMR (400 MHz, CDCl<sub>3</sub>) δ 7.68 (t, *J* = 7.3 Hz, 1H), 7.57 (dd, *J* = 20.4, 12.4 Hz, 1H), 7.41 (d, *J* = 7.2 Hz, 1H), 7.36 (d, *J* = 7.5 Hz, 1H), 7.34 – 7.16 (m, 3H), 2.49 (s, 1H). <sup>13</sup>C NMR

(100 MHz, CDCl<sub>3</sub>)  $\delta$  151.18, 150.80, 143.04, 141.28, 139.12, 138.97, 129.17, 128.49, 128.31, 128.19, 127.29, 125.43, 124.78, 123.36, 120.42, 120.19, 83.68. MALDI-TOF-MS (m/z): calcd. For C<sub>38</sub>H<sub>26</sub>O<sub>2</sub>: 514.1 [M<sup>+</sup>]; Found: 514.6.

**Synthesis of 3-(2-bromo-9-phenyl-9H-fluoren-9-yl)-9-hexyl-9H-carbazole (3):**

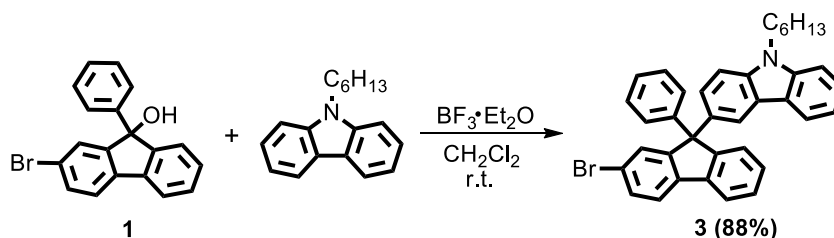

The compound was prepared by using **1** (0.336 g, 1 mmol.), 9-hexylcarbazole (0.301 g, 1.2 mmol), and BF<sub>3</sub>·OEt<sub>2</sub> (0.4 mL, 1.5 mmol). The reaction mixture was stirred at rt for 24 h. The mixture was extracted three times with CH<sub>2</sub>Cl<sub>2</sub> and the organic layer was dried over MgSO<sub>4</sub>, filtered and the solvent was removed under reduced pressure. Purification by silica gel column chromatography (petroleum ether : CH<sub>2</sub>Cl<sub>2</sub> = 10:1) to afford **3** (0.500 g, 88%) as a white powder. <sup>1</sup>H NMR (400 MHz, CDCl<sub>3</sub>)  $\delta$  7.96 (d, *J* = 7.8 Hz, 1H), 7.91 (d, *J* = 1.0 Hz, 1H), 7.78 (d, *J* = 7.5 Hz, 1H), 7.66 (dd, *J* = 8.6, 4.9 Hz, 2H), 7.54 – 7.48 (m, 2H), 7.48 – 7.42 (m, 1H), 7.42 – 7.36 (m, 2H), 7.35 – 7.24 (m, 8H), 7.17 (dd, *J* = 10.9, 3.9 Hz, 1H), 4.25 (t, *J* = 7.3 Hz, 2H), 1.99 – 1.78 (m, 2H), 1.42 – 1.27 (m, 6H), 0.99 – 0.76 (m, 3H). <sup>13</sup>C NMR (100 MHz, CDCl<sub>3</sub>)  $\delta$  154.10, 151.86, 146.07, 140.82, 139.45, 139.23, 139.02, 135.46, 130.64, 129.59, 128.40, 128.20, 127.59, 126.86, 126.43, 126.16, 125.69, 122.66, 121.56, 121.40, 120.46, 120.27, 119.61, 118.71, 108.66, 65.75, 43.19, 31.60, 29.01, 27.01, 22.58, 14.07. GC-MS (m/z): calcd. For C<sub>37</sub>H<sub>22</sub>BrN: 569.1[M<sup>+</sup>]; Found: 569.6.

**Synthesis of 9'-(9-hexyl-9H-carbazol-3-yl)-9,9'-diphenyl-9H,9'H-[2,2'-bifluoren]-9-ol (L-1):**

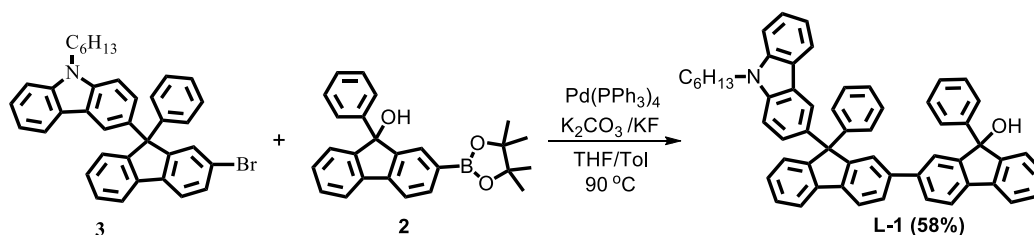

In a three-necked schlenk flask (150 mL), **3** (0.569 g, 1 mmol.), **2** (0.461 g, 1.2 mmol.), Pd(PPh<sub>3</sub>)<sub>4</sub> (35 mg, 0.03 mmol.) were added. The flask was evacuated and back-filled with nitrogen atmosphere over three times, after which degassed toluene (30 mL) and K<sub>2</sub>CO<sub>3</sub> aqueous solution (2 M, 5 mL, 10 eq) were injected into the flask through syringe. The mixture was heated up to 90 °C and stirred for 2 days. The mixture was extracted three times with CH<sub>2</sub>Cl<sub>2</sub> and the organic layer was dried over MgSO<sub>4</sub>, filtered and the solvent was removed under reduced pressure. Purification by silica gel column chromatography (petroleum ether : CH<sub>2</sub>Cl<sub>2</sub> = 1:1) to afford **L-1** (0.433 g, 58%) as a pale yellow powder. <sup>1</sup>H NMR (400 MHz, CDCl<sub>3</sub>) δ 7.93 (dd, *J* = 12.4, 8.9 Hz, 2H), 7.81 (dd, *J* = 7.7, 3.1 Hz, 2H), 7.67 (dd, *J* = 11.0, 3.6 Hz, 3H), 7.62 – 7.52 (m, 3H), 7.48 (d, *J* = 7.1 Hz, 1H), 7.43 – 7.30 (m, 10H), 7.27 (d, *J* = 7.9 Hz, 2H), 7.26 – 7.19 (m, 7H), 7.14 (dd, *J* = 15.4, 7.7 Hz, 1H), 4.23 (q, *J* = 7.6 Hz, 2H), 2.49 (s, 1H), 1.83 (dq, *J* = 14.8, 7.3 Hz, 2H), 1.32 (ddd, *J* = 11.6, 10.3, 5.7 Hz, 6H), 0.87 (d, *J* = 6.9 Hz, 3H). <sup>13</sup>C NMR (100 MHz, CDCl<sub>3</sub>) δ 152.84, 152.47, 151.17, 150.79, 146.79, 143.18, 141.84, 140.88, 140.50, 139.77, 139.44, 138.71, 136.20, 129.21, 129.54–128.11, 127.87, 127.43, 127.11, 126.71, 126.67 – 126.14, 125.58, 124.90, 123.58, 123.01–122.49, 120.39, 119.82, 118.71, 108.64 83.73, 65.83, 53.51, 43.20, 33.95, 32.06, 31.65, 30.45–28.53, 28.99–28.82, 28.99–28.68, 27.05, 22.73, 14.20. MALDI-TOF-MS (*m/z*): calcd. For C<sub>56</sub>H<sub>45</sub>NO: 747.3 [M<sup>+</sup>]; Found: 747.7.

**Synthesis of 9,9'-bis(9-hexyl-9H-carbazol-3-yl)-9,9'-diphenyl-9H,9'H-2,2'-bifluorene (U-1):**

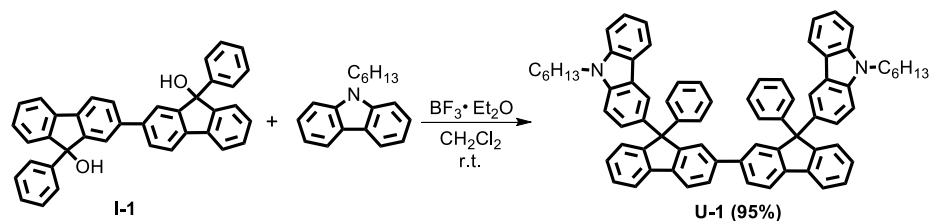

The compound was prepared following the general procedures using **I-1** (0.514 g, 1 mmol.), 9-hexylcarbazole (0.753 g, 3.0 mmol.), and  $\text{BF}_3 \cdot \text{OEt}_2$  (0.8 mL, 3.0 mmol.). The reaction mixture was stirred at rt under nitrogen for 24 h. The mixture was extracted three times with  $\text{CH}_2\text{Cl}_2$  and the organic layer was dried over  $\text{MgSO}_4$ , filtered and the solvent was removed under reduced pressure. Purification by silica gel column chromatography (petroleum ether :  $\text{CH}_2\text{Cl}_2$  = 5:1) to afford **U-1** (0.931 g, 95%). The obtained white solid was recrystallized from  $\text{CH}_2\text{Cl}_2$ /hexane and yielded pure white solid.  $^1\text{H}$  NMR (400 MHz,  $\text{CDCl}_3$ )  $\delta$  7.98 (m, 1H), 7.91 (m, 1H), 7.84 – 7.79 (m, 1H), 7.76 – 7.71 (m, 1H), 7.62 – 7.56 (m, 1H), 7.52 (d,  $J$  = 7.6 Hz, 1H), 7.46 – 7.31 (m, 3H), 7.31 – 7.18 (m, 3H), 7.14 (td,  $J$  = 7.1, 3.6 Hz, 1H), 4.23 (t,  $J$  = 7.2 Hz, 4H), 1.90 – 1.76 (m, 4H), 1.47 – 1.20 (m, 15H), 0.97 – 0.78 (m, 11H).  $^{13}\text{C}$  NMR (100 MHz,  $\text{CDCl}_3$ )  $\delta$  152.61, 152.30, 146.79, 141.05, 140.97, 140.78, 139.79, 139.36, 136.24, 136.22, 128.81, 128.32, 128.29, 127.70, 127.43, 127.31, 127.22, 126.78, 126.73, 126.61, 126.43, 126.36, 126.32, 125.54, 125.06, 124.99, 122.77, 122.62, 122.59, 120.46, 120.39, 120.24, 119.70, 118.62, 108.60, 108.50, 65.70, 43.17, 31.60, 29.01, 27.01, 22.75, 22.59, 14.09, 14.08. MALDI-TOF-MS ( $m/z$ ): calcd. For  $\text{C}_{74}\text{H}_{64}\text{N}_2$ : 980.5 [ $\text{M}^+$ ]; Found: 980.6.

#### Synthesis of 3-(2-bromo-9-phenyl-9H-fluoren-9-yl)-9-hexyl-9H-carbazole (**4**):

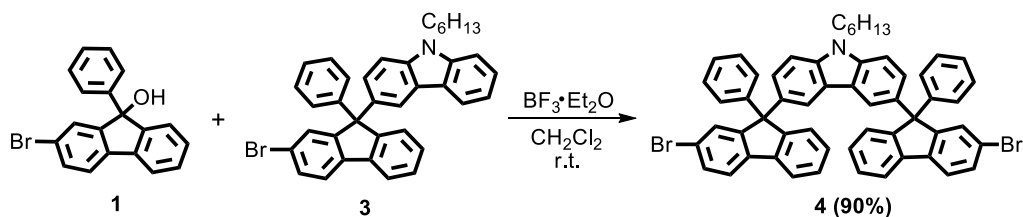

The compound was prepared following the general procedures using **1** (0.672 g, 2 mmol.), **3** (0.569 g, 1 mmol.), and  $\text{BF}_3 \cdot \text{OEt}_2$  (0.4 mL, 1.5 mmol.). The reaction mixture was stirred at r.t. under nitrogen for 24 h. The mixture was extracted three times with  $\text{CH}_2\text{Cl}_2$  and the organic layer was dried over  $\text{MgSO}_4$ , filtered and the solvent was removed under reduced pressure. Purification by silica gel column chromatography (petroleum ether :  $\text{CH}_2\text{Cl}_2$  = 5:1) to afford **4** (0.800 g, 90%). The obtained white solid was recrystallized from  $\text{CH}_2\text{Cl}_2$ /hexane and yielded pure white solid.  $^1\text{H}$  NMR (400 MHz,  $\text{CDCl}_3$ )  $\delta$  7.81 (d,  $J$  = 8.3 Hz, 1H), 7.75 (d,  $J$  = 7.6 Hz, 1H), 7.65 (d,  $J$  = 8.1 Hz, 1H), 7.60 (d,  $J$  = 3.3 Hz, 1H), 7.52 – 7.42 (m, 2H), 7.37 (t,  $J$  = 7.4 Hz, 1H), 7.30 (t,  $J$  = 7.0 Hz, 1H), 7.28 – 7.17 (m, 7H), 4.18 (t,  $J$  = 7.3 Hz, 1H), 1.92 – 1.65 (m, 1H), 1.32 (d,  $J$  = 19.9 Hz, 5H).  $^{13}\text{C}$  NMR (100 MHz,  $\text{CDCl}_3$ )  $\delta$  154.04, 154.03, 151.83, 151.79, 146.09, 139.85, 139.84, 139.17, 139.16, 138.98, 138.96, 135.38, 135.37, 130.64, 129.57, 128.41, 128.15, 128.12, 127.57, 126.86, 126.40, 126.30, 126.25, 122.58, 122.54, 121.56, 121.39, 121.36, 120.25, 119.85, 119.79, 108.62, 108.59, 65.72, 65.71, 43.23, 31.57, 29.75, 28.99, 26.97, 22.55, 14.07. MALDI-TOF-MS ( $m/z$ ): calcd. For  $\text{C}_{56}\text{H}_{43}\text{Br}_2\text{N}$ : 889.1 [ $\text{M}^+$ ]; Found: 888.9.

## Synthesis of

**9',9'''-(9-hexyl-9H-carbazole-3,6-diyl)bis(9,9'-diphenyl-9H,9'H-[2,2'-bifluoren]-9-ol)**

(U-2):

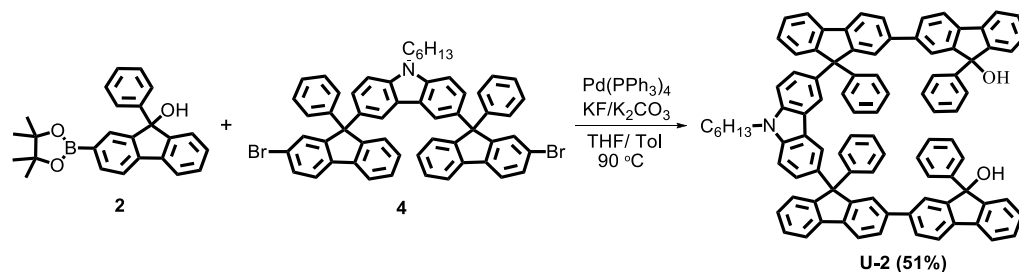

In a three-necked schlenk flask (150 mL), **4** (0.889 g, 1 mmol.), **2** (1.152 g, 3 mmol.),  $\text{Pd(PPh}_3)_4$  (70 mg, 0.06mmol.) were added. The flask was evacuated and back-filled with nitrogen atmosphere over three times, after which degassed toluene (30 mL) and  $\text{K}_2\text{CO}_3$  aqueous solution (2M, 5 mL, 10 eq) were injected into the flask through syringe. The

mixture was heated up to 90 °C and stirred for 2 days. The mixture was extracted three times with CH<sub>2</sub>Cl<sub>2</sub> and the organic layer was dried over MgSO<sub>4</sub>, filtered and the solvent was removed under reduced pressure. Purification by silica gel column chromatography (petroleum ether : CH<sub>2</sub>Cl<sub>2</sub> = 1:1) to afford **U-2** (0.634 g, 51%) as a white powder. <sup>1</sup>H NMR (400 MHz, CDCl<sub>3</sub>) δ 7.83 (d, *J* = 10.1 Hz, 2H), 7.77 (t, *J* = 7.2 Hz, 4H), 7.70 – 7.58 (m, 6H), 7.56 – 7.46 (m, 6H), 7.45 – 7.30 (m, 12H), 7.26 (s, 4H), 7.26 – 7.25 (m, 1H), 7.24 (d, *J* = 2.7 Hz, 6H), 7.23 – 7.14 (m, 14H), 4.21 – 4.08 (m, 2H), 2.52 (d, *J* = 19.1 Hz, 1H), 2.46 (s, 1H), 1.83 – 1.71 (m, 2H), 1.31 – 1.21 (m, 6H), 0.86 – 0.80 (m, 3H). <sup>13</sup>C NMR (100 MHz, CDCl<sub>3</sub>) δ 152.78, 152.48, 151.05, 150.74, 146.65, 143.10, 141.86, 140.36, 139.63, 139.30, 138.77–138.42, 136.06–135.63, 129.18, 128.30, 127.76, 127.33, 127.17–126.86, 126.49, 125.46, 124.85, 123.47, 122.87–122.29, 120.27, 119.99–119.26, 108.46, 83.66, 65.71, 43.19, 31.55, 29.74, 28.97, 26.96, 22.53, 14.04. MALDI-TOF-MS (*m/z*): calcd. For C<sub>94</sub>H<sub>69</sub>NO<sub>2</sub>: 1244.5 [M<sup>+</sup>]; Found: 1244.1.

#### Synthesis of Grid-1 with L-1:

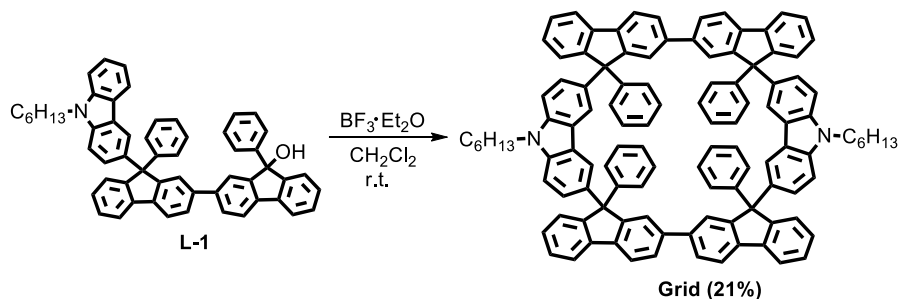

The compound was prepared by using **L-1** (0.224 g, 0.3 mmol), BF<sub>3</sub>·OEt<sub>2</sub> (0.4 ml, 1.5 mmol) was diluted together with CH<sub>2</sub>Cl<sub>2</sub> then dropwise. The reaction mixture was stirred at rt under nitrogen for 24 h. The mixture was extracted three times with CH<sub>2</sub>Cl<sub>2</sub> and the organic layer was dried over MgSO<sub>4</sub>, filtered and the solvent was removed under reduced pressure. Purification by silica gel column chromatography (petroleum ether : CH<sub>2</sub>Cl<sub>2</sub> = 2:1) to afford **Grid** (0.306g, 21%) as a white powder. <sup>1</sup>H NMR (400 MHz, CDCl<sub>3</sub>) δ 7.90 (d, *J* = 7.5 Hz, 1H), 7.80 (s, 1H), 7.66 (dd, *J* = 16.9, 7.7 Hz, 3H), 7.47 (t, *J* = 7.4 Hz, 1H), 7.38 – 7.30 (m,

3H), 7.07 (d,  $J = 11.5$  Hz, 7H), 4.19 (d,  $J = 7.1$  Hz, 4H), 1.79 (d,  $J = 7.1$  Hz, 4H), 1.38 – 1.25 (m, 6H), 0.87 (dd,  $J = 12.4, 5.8$  Hz, 3H).  $^{13}\text{C}$  NMR (101 MHz,  $\text{CDCl}_3$ )  $\delta$  152.12, 141.94, 140.34, 139.44, 138.53, 135.63, 128.19, 127.91, 127.68, 127.54, 126.39, 126.20, 120.59, 119.78, 65.41, 43.29, 31.54, 29.72, 26.95, 22.55, 14.03. MALDI-TOF-MS ( $m/z$ ): calcd. For  $\text{C}_{112}\text{H}_{86}\text{N}_2$ : 1458.6  $[\text{M}^+]$ ; Found: 1458.7.

### Synthesis of Grid-1

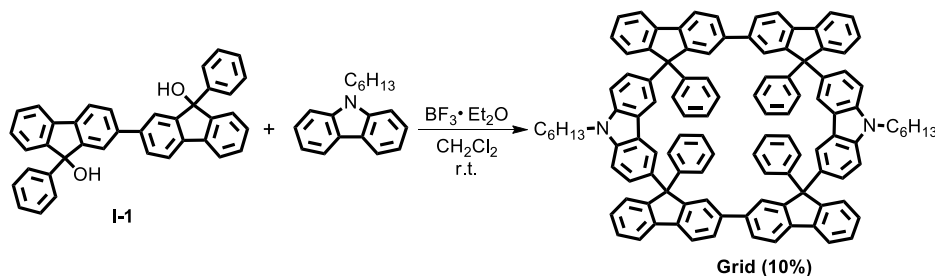

The compound was prepared by using **I-1** (0.514 g, 1 mmol.), 9-hexylcarbazole (0.251 g, 1 mmol.) and  $\text{BF}_3 \cdot \text{OEt}_2$  (1.6 mL, 6 mmol) was diluted together with  $\text{CH}_2\text{Cl}_2$  then dropwise,. The reaction mixture was stirred at rt under nitrogen for 24 h. The mixture was extracted three times with  $\text{CH}_2\text{Cl}_2$  and the organic layer was dried over  $\text{MgSO}_4$ , filtered and the solvent was removed under reduced pressure. Purification by silica gel column chromatography (petroleum ether:  $\text{CH}_2\text{Cl}_2 = 2:1$ ) to afford **Grid** (0.146 g, 10%) as a white powder.

### Synthesis of Grid-1with U-1:

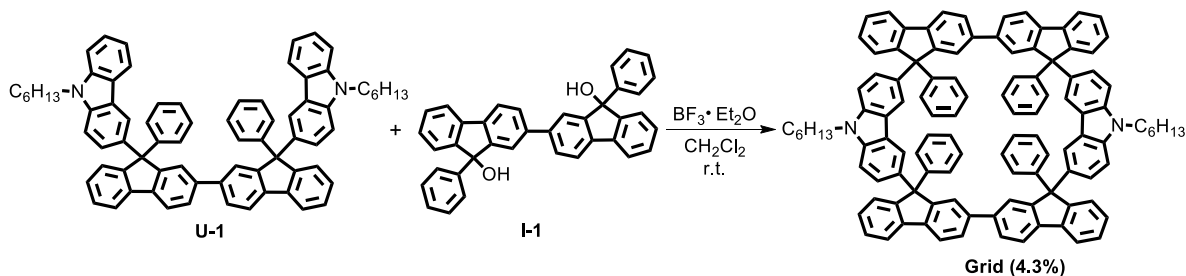

The compound was prepared by using **I-1** (0.102 g, 0.2 mmol.), **U-1** (0.196 g, 0.2 mmol.) and  $\text{BF}_3 \cdot \text{OEt}_2$  (0.3 mL, 1.2 mmol) was diluted together with  $\text{CH}_2\text{Cl}_2$  then dropwise. The

reaction mixture was stirred at rt under nitrogen for 24 h. The mixture was extracted three times with CH<sub>2</sub>Cl<sub>2</sub> and the organic layer was dried over MgSO<sub>4</sub>, filtered and the solvent was removed under reduced pressure. Purification by silica gel column chromatography (petroleum ether : CH<sub>2</sub>Cl<sub>2</sub> = 2:1) to afford **Grid** (0.062 g, 4.3%) as a white powder.

#### Synthesis of Grid-1 with U-2:

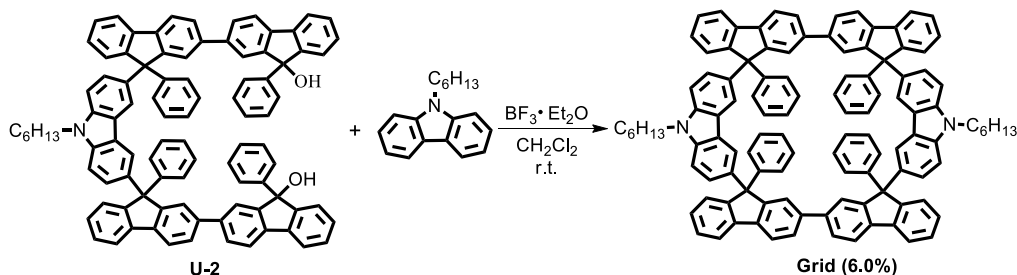

The compound was prepared by using **U-2** (0.124 g, 0.1 mmol.), 9-hexyl-9H-carbazole (0.025 g, 0.1 mmol.) and BF<sub>3</sub>·OEt<sub>2</sub> (0.16 ml, 0.6 mmol) was diluted together with CH<sub>2</sub>Cl<sub>2</sub> then dropwise. The reaction mixture was stirred rt under nitrogen for 24 h. The mixture was extracted three times with CH<sub>2</sub>Cl<sub>2</sub> and the organic layer was dried over MgSO<sub>4</sub>, filtered and the solvent was removed under reduced pressure. Purification by silica gel column chromatography (petroleum ether : CH<sub>2</sub>Cl<sub>2</sub> = 2:1) to afford **Grid** (0.087 g, 6.0%) as a white powder.

## OLED based on Grid

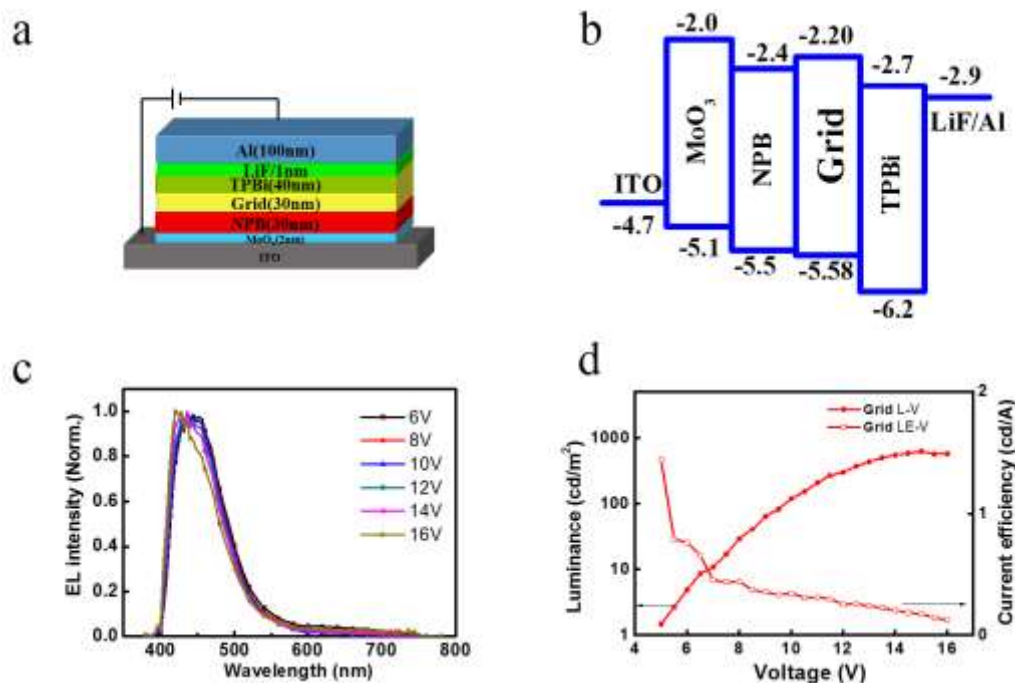

**Fig. 1** (a) The schematic illustration of the OLED; (b) Energy level diagram of OLED; (c) The EL spectra of **Grid**; (d)  $L-V$  and  $LE-V$  characteristics of the device prepared from **Grid**.

## References

- (1) (a) Xie, L. H.; Hou, X.-Y.; Hua, Y.-R.; Tang, C.; Liu, F.; Fan, Q.-L.; Huang, W. *Org. Lett.* **2006**, 8, 3701–3704. (b) Lin, J.; Yu, Z.; Zhu, W.; Xing, G.; Lin, Z.; Yang, S.; Xie, L. H.; Niu, C.; Huang, W. *Polymer Chem.* **2013**, 4, 477–483.
- (2) Frisch, M. J. T. G. W.; Schlegel, H. B.; Scuseria, G. E.; Robb, M. A.; Cheeseman, J. R.; Scalmani, G.; Barone, V.; Mennucci, B.; Petersson, G. A.; Nakatsuji, H.; Caricato, M.; Hratchian, X. Li, H. P.; Izmaylov, A. F.; Bloino, J.; Zheng, G.; Sonnenberg, J. L.; Hada, M.; Ehara, M.; Toyota, K.; Fukuda, R.; Hasegawa, J.; Ishida, M.; Nakajima, T.; Honda, Y.; Kitao, O.; Nakai, H.; Vreven, T.; Montgomery Jr., J. A.; Peralta, J. E.; Ogliaro, F.; Bearpark, M.; Heyd, J. J.; Brothers, E.; Kudin, K. N.; Staroverov, V. N.; Kobayashi, R.; Normand, J.; Raghavachari, K.; Rendell, A.; Burant, J. C.; Iyengar, S. S.; Tomasi, J.; Cossi, M.; Rega, N.;

Millam, J. M.; Klene, M.; Knox, J. E.; Cross, J. B.; Bakken, V.; Adamo, C.; Jaramillo, J.; Gomperts, R.; Stratmann, R. E.; Yazyev, O.; Austin, A. J.; Cammi, R.; Pomelli, C.; Ochterski, J. W.; Martin, R. L.; Morokuma, K.; Zakrzewski, V. G.; Voth, G. A.; Salvador, P.; Dannenberg, J. J.; Dapprich, S.; Daniels, A. D.; Farkas, O.; Foresman, J. B.; Ortiz, J. V.; Cioslowski, J.; Fox, D. J. *Gaussian 09*, Revision, A.02, **2009**.

(3) Johnson, E. R.; Keinan, S.; Mori-Sánchez, P.; Contreras-García, J.; Cohen, A. J.; Yang, W. *J. Am. Chem. Soc.* **2010**, *132*, 6498–6506.

(4) (a) Lu, T.; Chen, F. *J. Comput. Chem.* **2012**, *33*, 580–592. (b) Hu, C. P.; Liu, Y. Y.; Xie, L. H.; Li, J. W.; Li, Y. R.; Tai, Q.; Yi, M. D.; Huang, W. *Chem. Phys. Lett.* **2013**, 150–155.

### MALDI-TOF-MS of compounds:

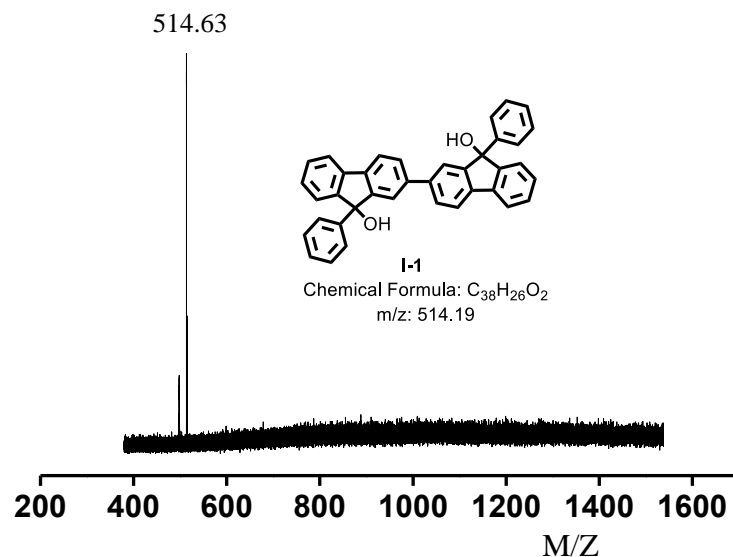

**Fig. 2** MALDI-TOF-MS spectra of **I-1**

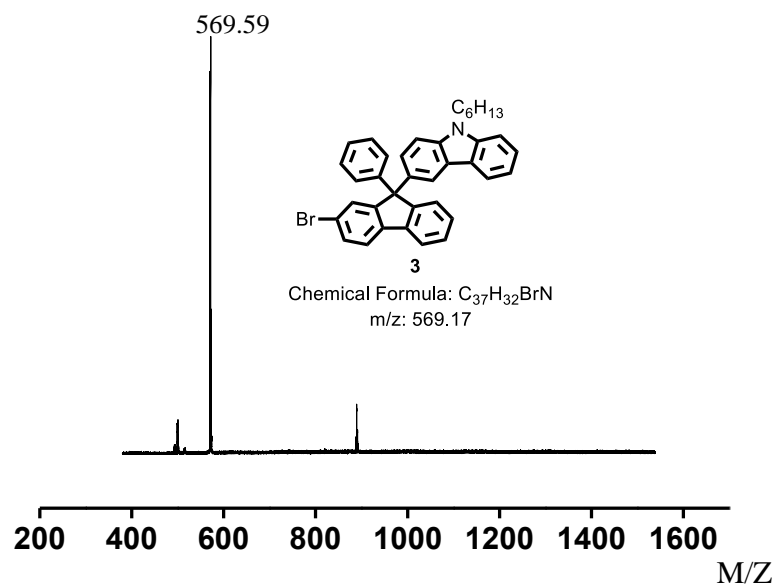

**Fig. 3** MALDI-TOF-MS of **3**

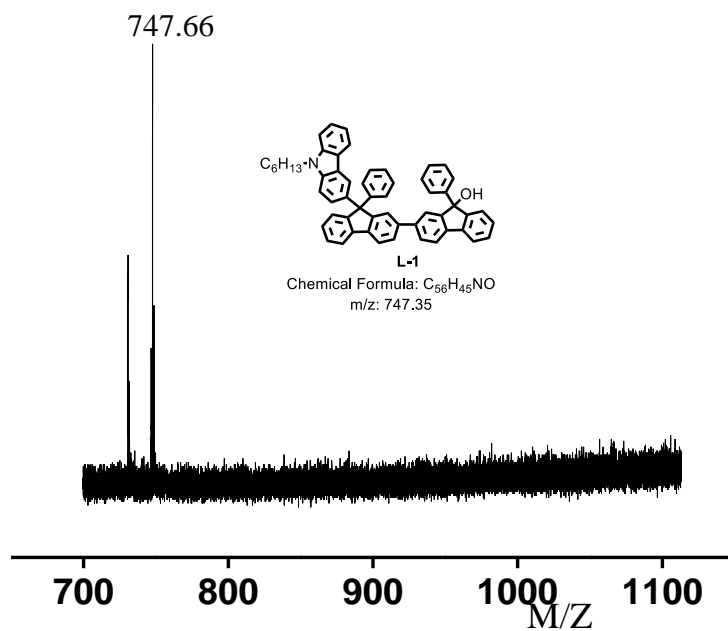

**Fig. 4** MALDI-TOF-MS spectra of **L-1**

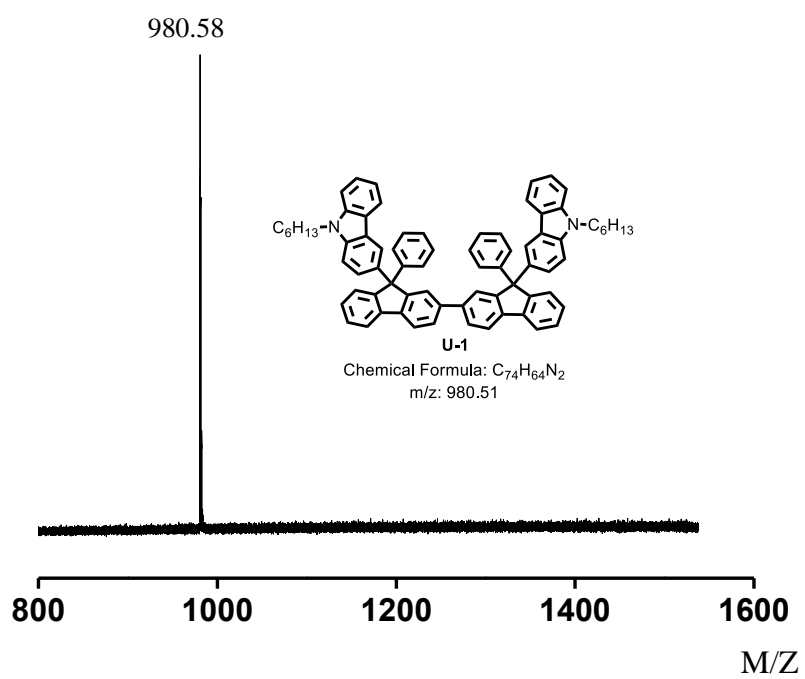

**Fig. 5** MALDI-TOF-MS spectra of U-1

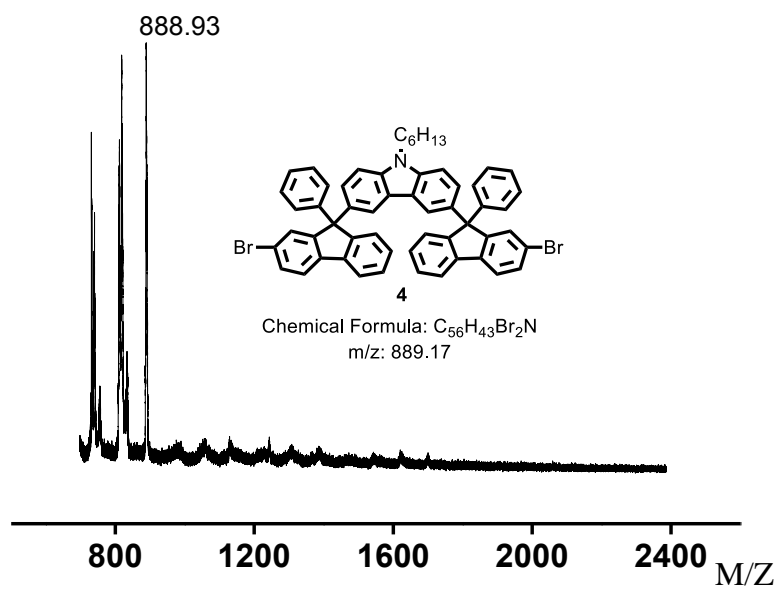

**Fig. 6** MALDI-TOF-MS of 4

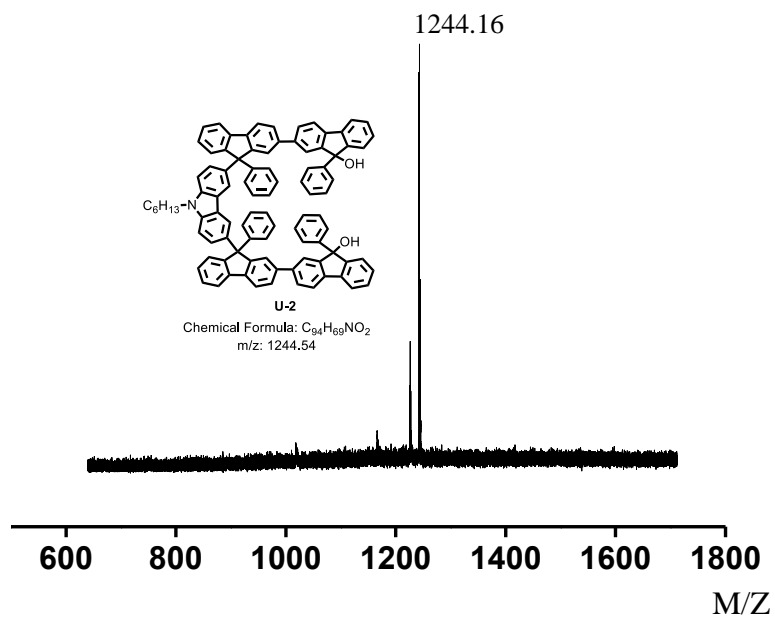

**Fig. 7** MALDI-TOF-MS of U-2

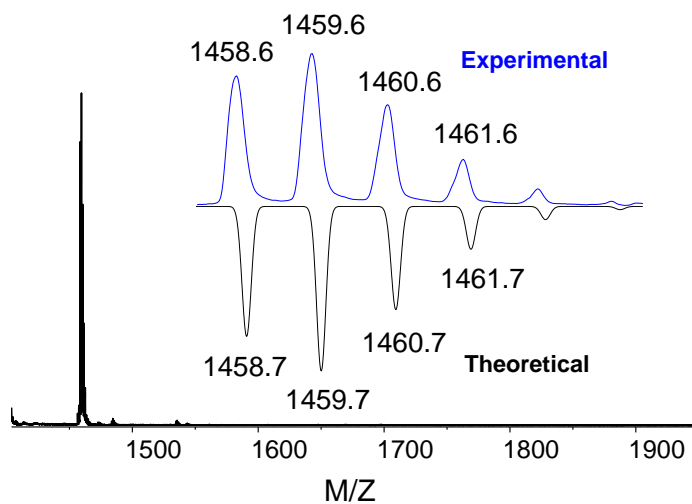

**Fig. 8** MALDI-TOF-MS of Grid

### GPC spectrum and crude product of Grid

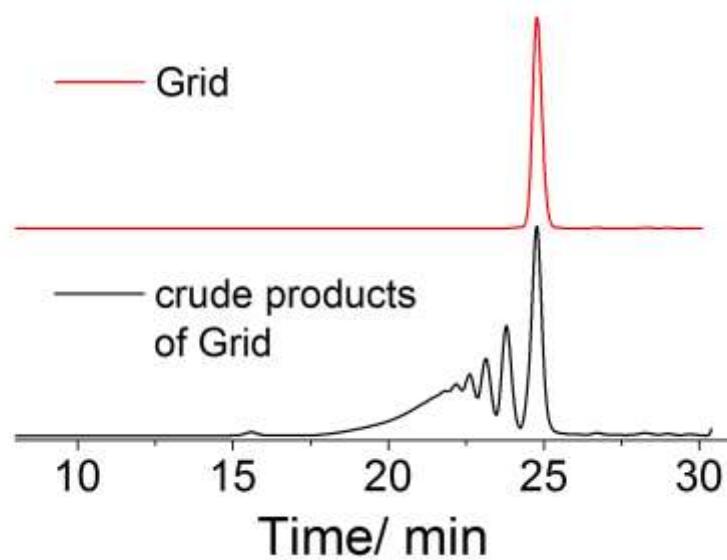

**Fig. 9** GPC spectrum of **Grid** and crude product of **Grid**

### Standard potential for ferrocene/ferrocenium vs $\text{Ag}/\text{Ag}^+$

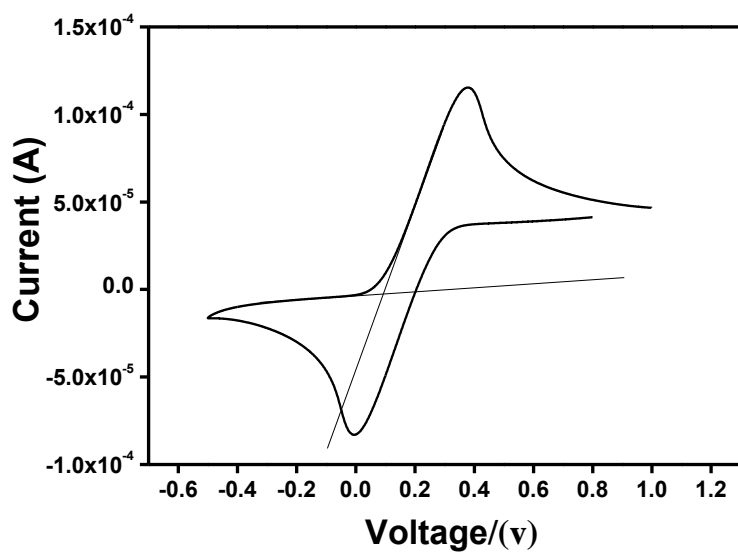

**Fig. 10** Cyclic voltammograms of ferrocene/ferrocenium vs  $\text{Ag}/\text{Ag}^+$

**Table 1 The HOMO and LUMO energy levels of Grid**

| compound    | Oxidation potential | Reduction potential | HOMO    | LUMO     |
|-------------|---------------------|---------------------|---------|----------|
| <b>Grid</b> | 0.87 eV             | -2.51 eV            | 5.58 eV | -2.20 eV |

# $^1\text{H}$ and $^{13}\text{C}$ NMR spectra of the compounds

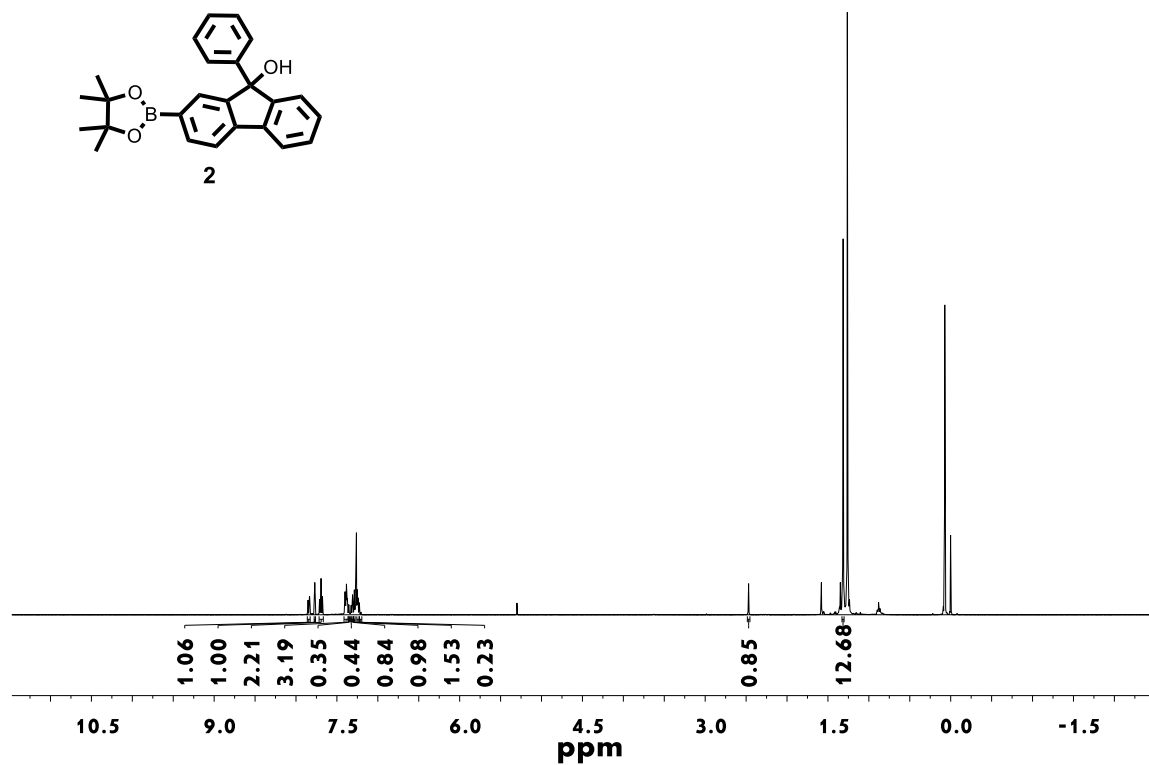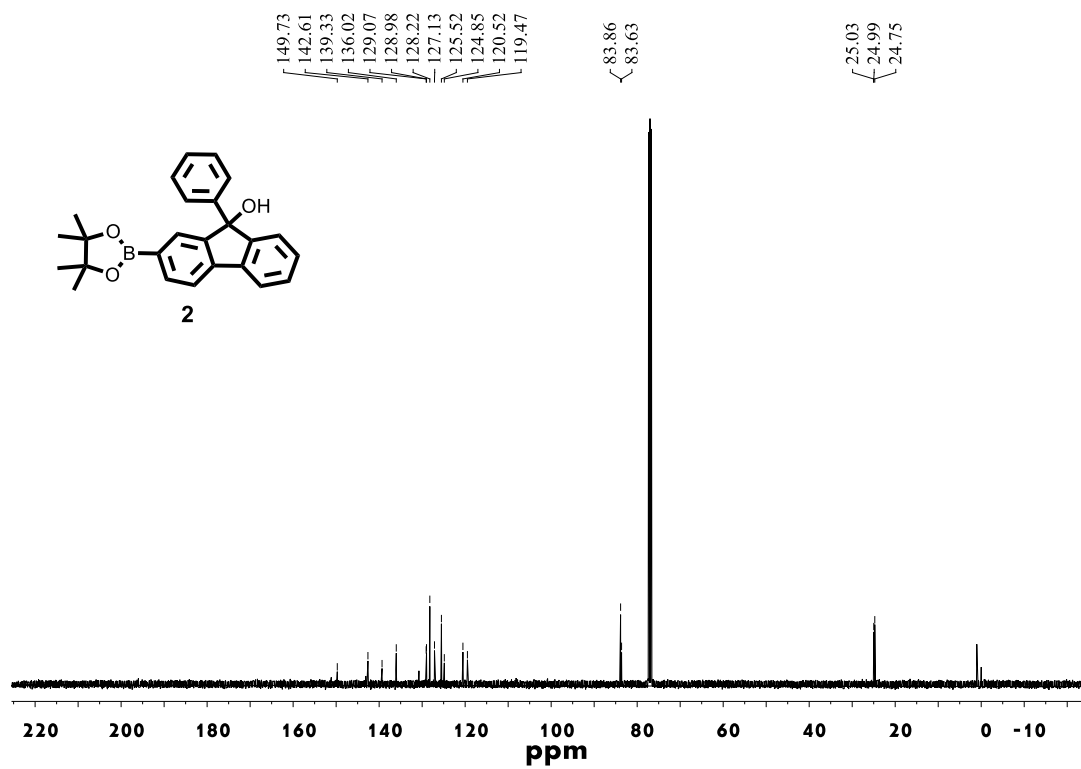



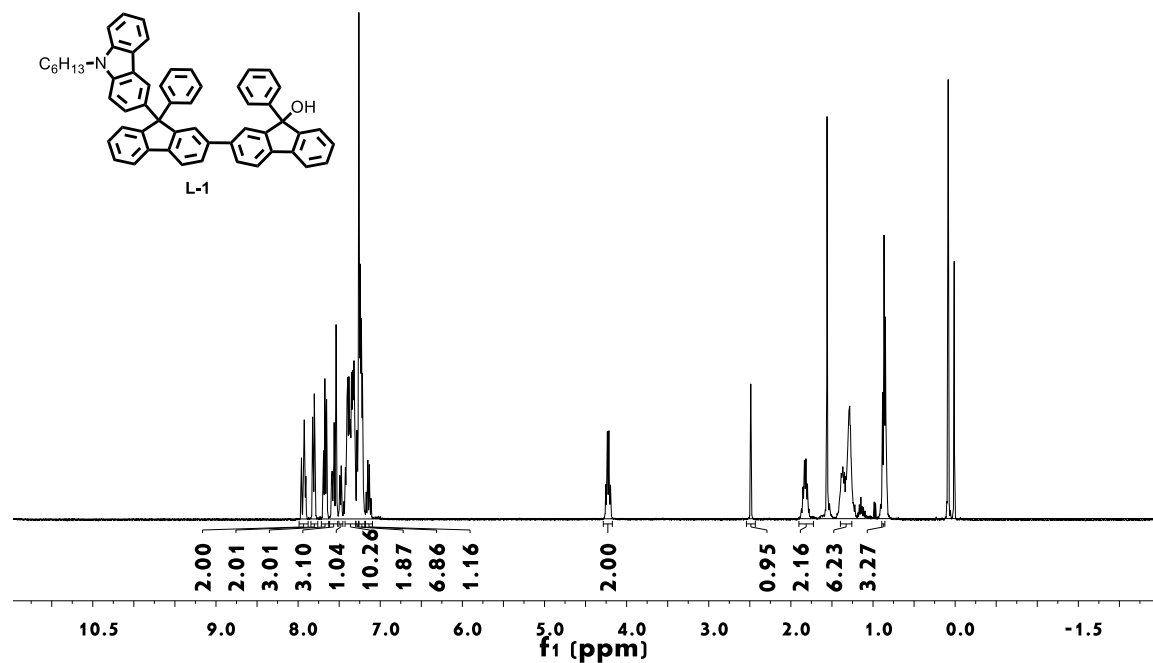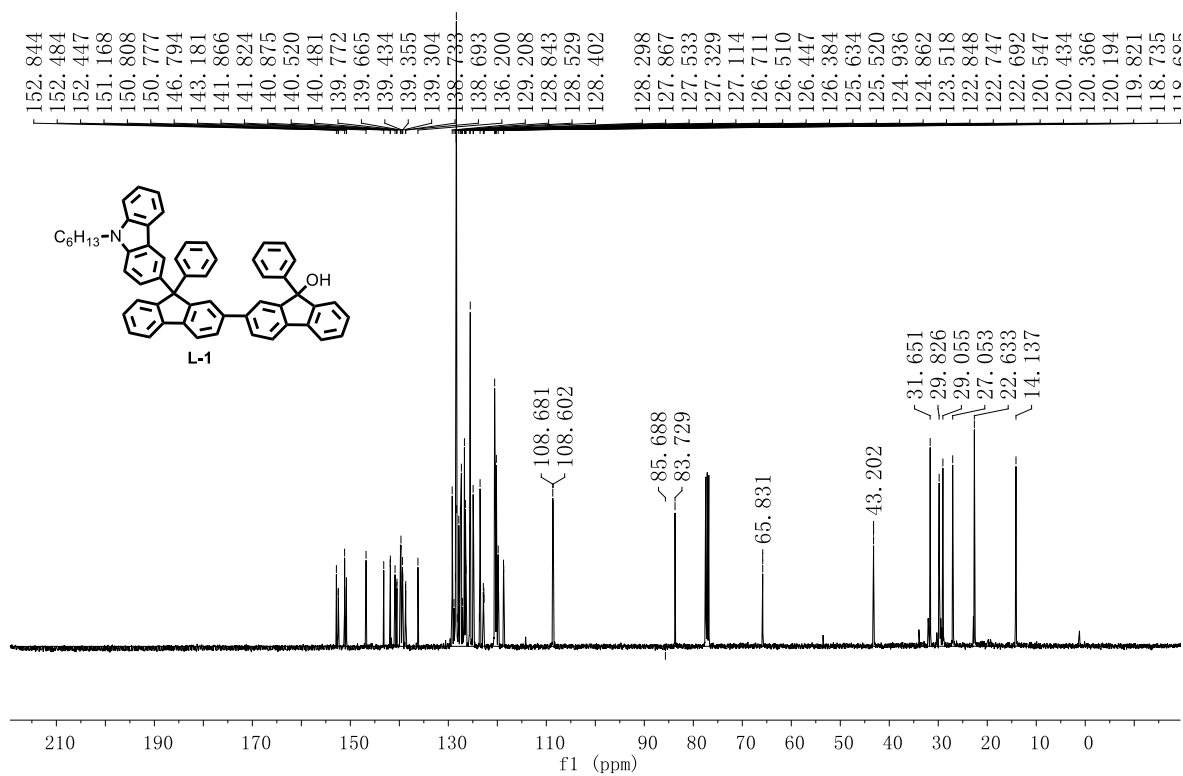

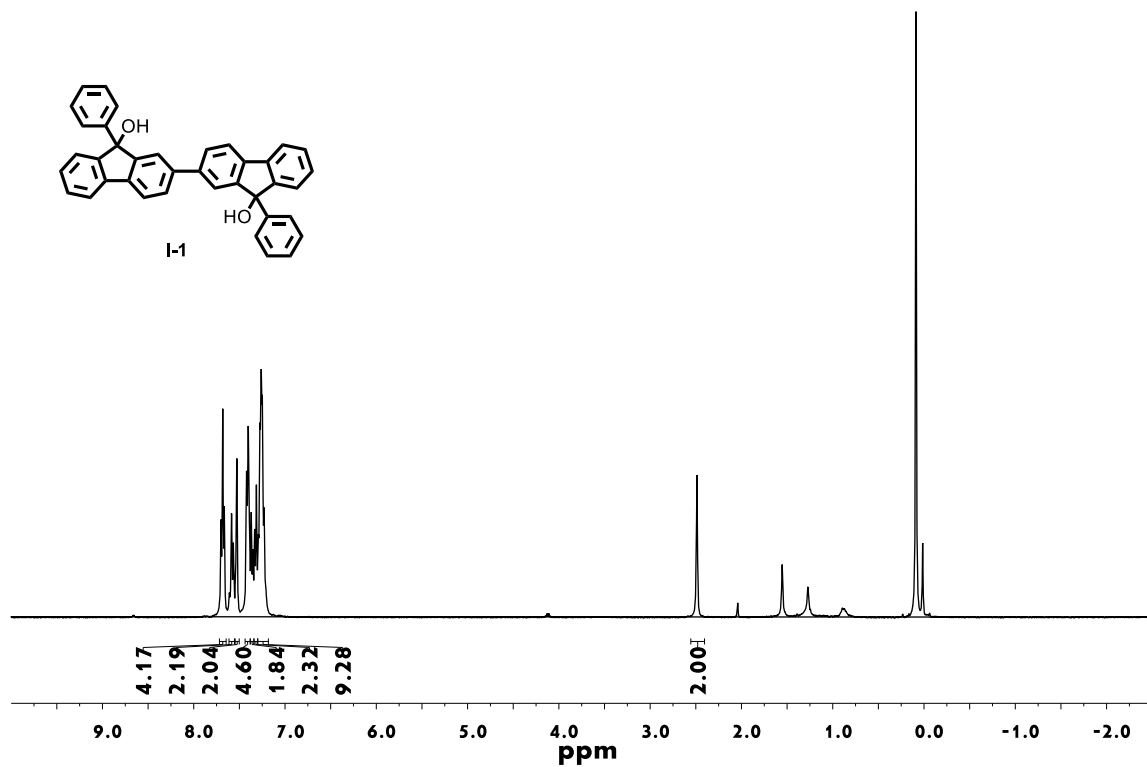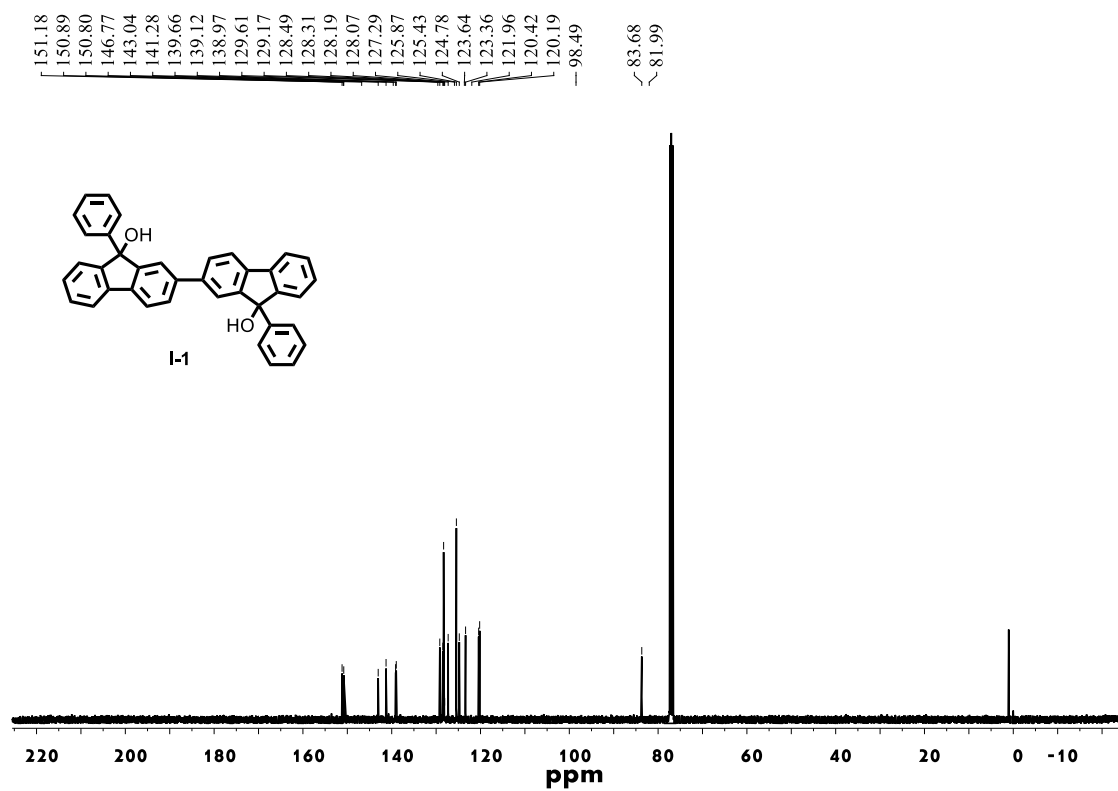

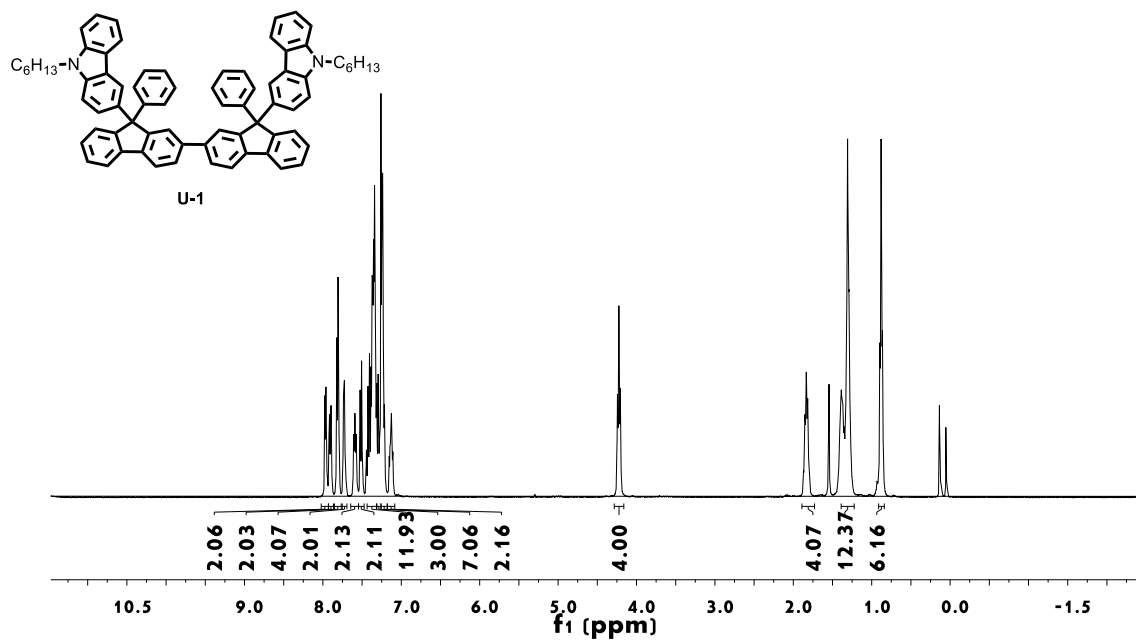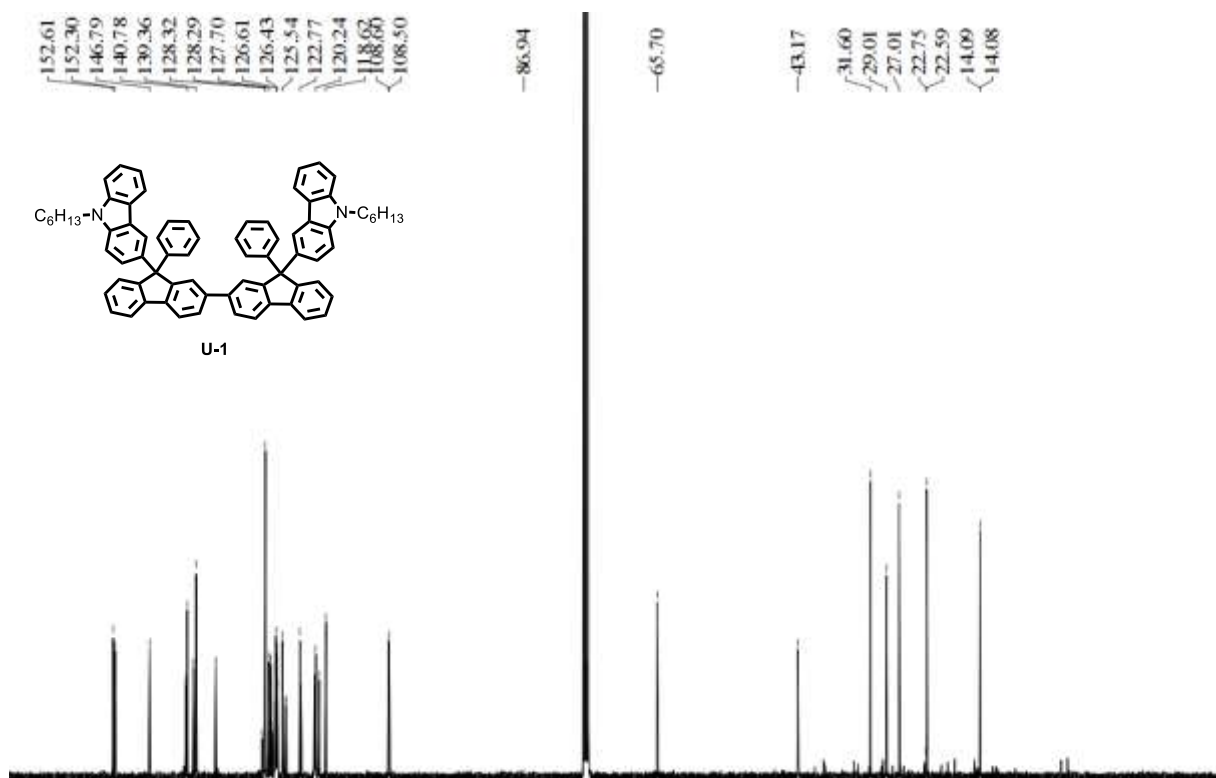

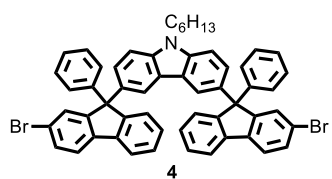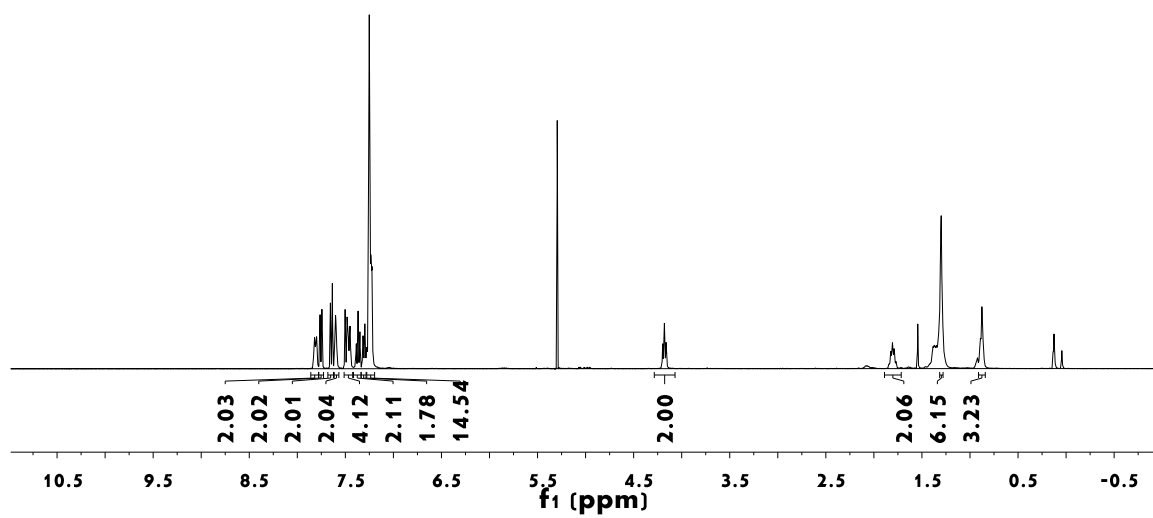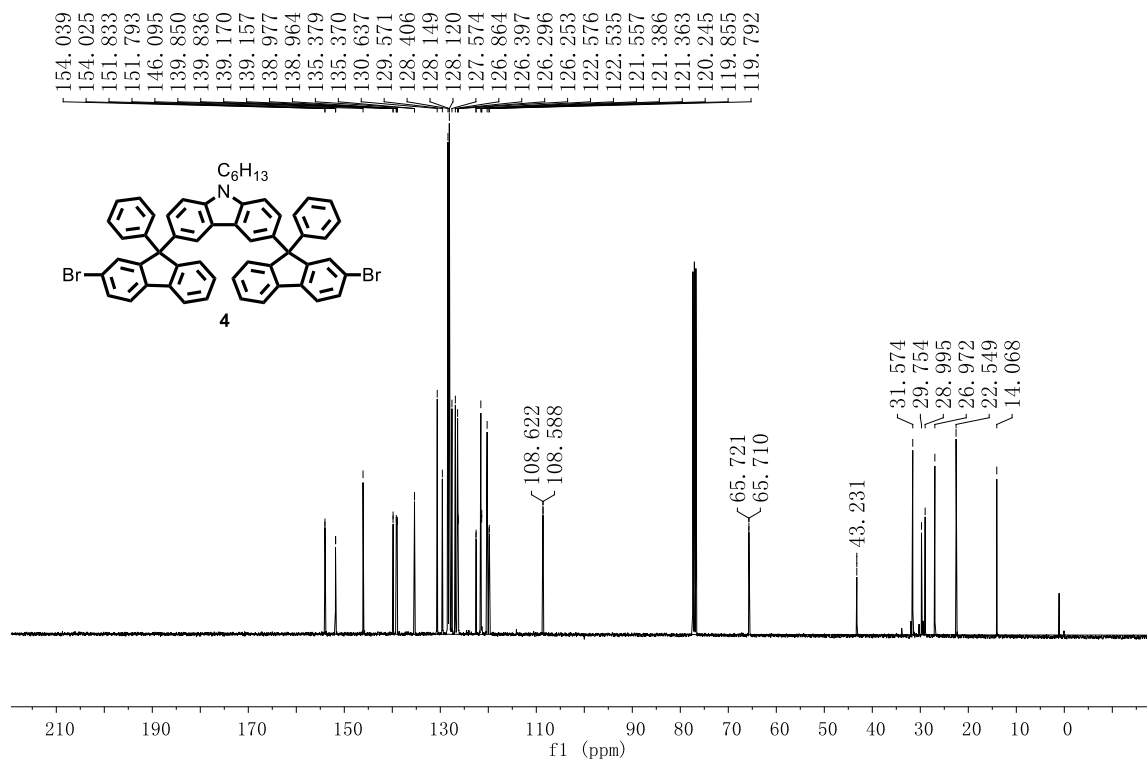

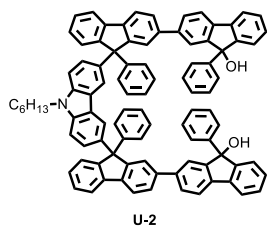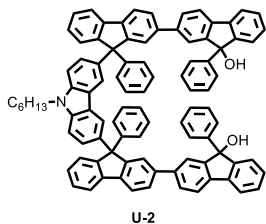

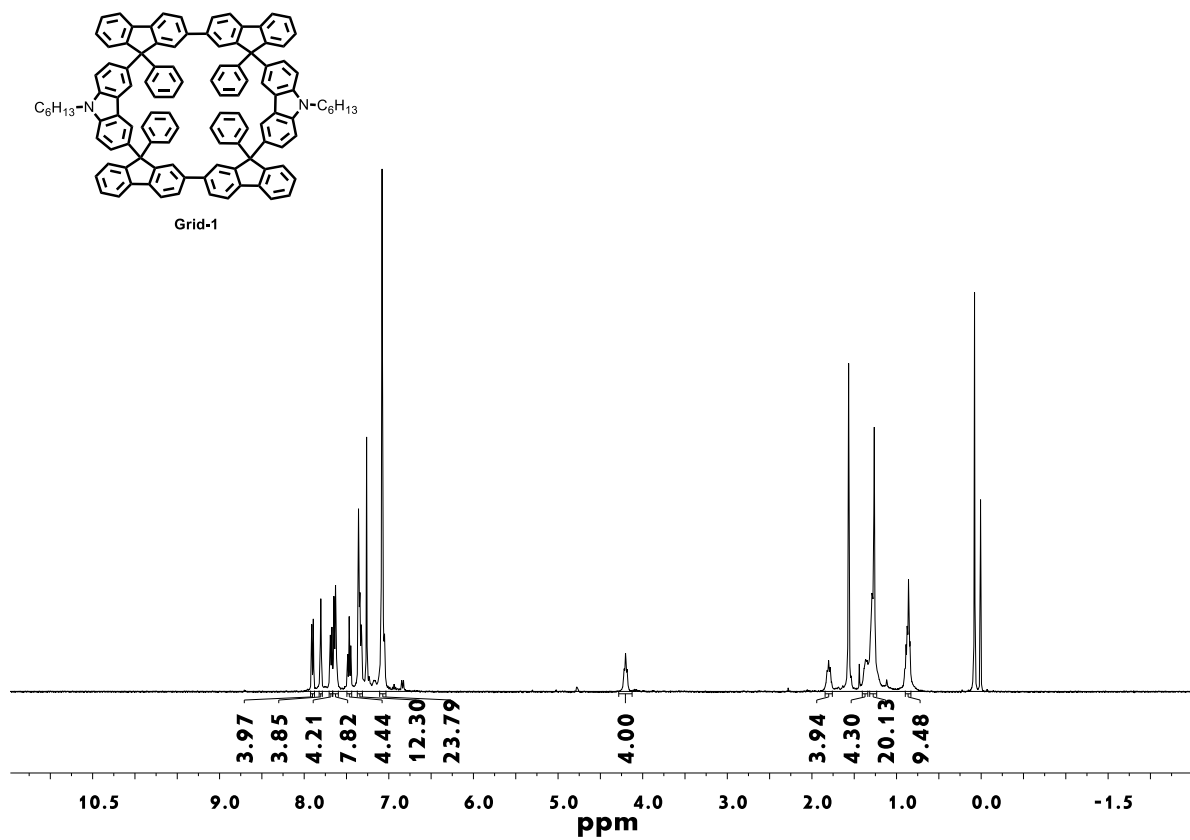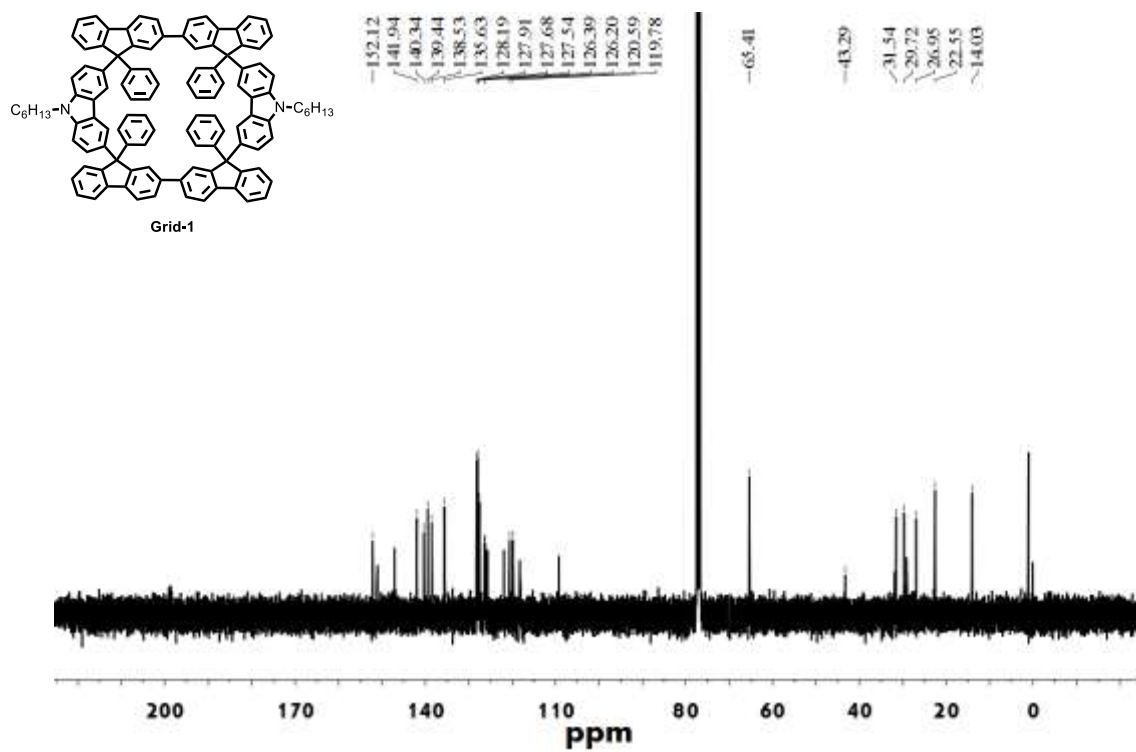

Supplement: c6qm00004e1.pdf [file c6qm00004e1.pdf]
